# Supplementary material
Source: PubMed Central journal article supplement (PMC528820)
Supplement: nar_32_19_e150__1.pdf [file nar_32_19_e150__1.pdf]

### Supplementary material

The data are arranged according to the Venn diagram in Figure 4A and the fold induction refers to the average of the two independent cell lines for each transcription factor. The probeset IDs are the reference number of the probes of the Affymetrix oligonucleotide microarray RAE230A and the official gene symbols (Affymetrix, release April 2004) are given where available.

**Table SI: HNF6 only affected probesets**

| <b>Probeset</b> | <b>Gene</b> | <b>HNF6</b> |
|-----------------|-------------|-------------|
| 1370580_a_at    | Cyp2c6      | 69.6        |
| 1370352_at      | Ces1        | 68.6        |
| 1390622_at      | ---         | 41.5        |
| 1373066_at      | ---         | 22.5        |
| 1371883_at      | ---         | 18.4        |
| 1389221_at      | ---         | 17.0        |
| 1368870_at      | Id2         | 15.9        |
| 1368485_at      | Avil        | 15.0        |
| 1384420_at      | ---         | 11.4        |
| 1368621_at      | Aqp9        | 10.4        |
| 1387760_a_at    | Onecut1     | 9.2         |
| 1367845_at      | Nef3        | 9.1         |
| 1371083_at      | Spin2a      | 8.5         |
| 1373697_at      | ---         | 8.3         |
| 1370058_at      | Nfl         | 8.2         |
| 1368144_at      | Rgs2        | 8.1         |
| 1376106_at      | ---         | 7.8         |
| 1369165_at      | Trpc3       | 7.7         |
| 1379492_at      | ---         | 7.5         |
| 1370981_at      | Rxrg        | 7.2         |
| 1376208_at      | ---         | 6.8         |
| 1369814_at      | Scya20      | 6.7         |
| 1370154_at      | Lyz         | 6.3         |
| 1374065_at      | ---         | 6.2         |
| 1370059_at      | Nfl         | 6.0         |
| 1390209_at      | ---         | 5.7         |
| 1376215_at      | ---         | 5.6         |
| 1398276_at      | Dlg2        | 5.5         |
| 1374699_at      | ---         | 5.3         |
| 1387376_at      | Aox1        | 5.3         |
| 1368550_at      | Hfh1        | 5.3         |
| 1370530_a_at    | Pld1        | 5.1         |
| 1367816_at      | Gllg15b     | 5.0         |
| 1374930_at      | ---         | 5.0         |
| 1387074_at      | Rgs2        | 4.7         |
| 1369218_at      | Met         | 4.6         |
| 1368851_at      | Ets1        | 4.5         |
| 1372616_at      | ---         | 4.5         |
| 1369770_at      | Sstr1       | 4.5         |
| 1387803_at      | Pppr2b2     | 4.5         |
| 1384137_at      | ---         | 4.3         |
| 1368016_at      | Pecr        | 4.2         |
| 1386908_at      | Glrx1       | 4.2         |
| 1387969_at      | Cxcl10      | 4.2         |
| 1376657_at      | ---         | 4.1         |

|              |          |      |
|--------------|----------|------|
| 1368599_at   | Slc9a2   | 4.1  |
| 1377308_a_at | ---      | 4.1  |
| 1387968_at   | Ntt73    | 4.0  |
| 1370775_a_at | Calca    | 3.9  |
| 1370529_a_at | Pld1     | 3.9  |
| 1379252_at   | ---      | 3.8  |
| 1390146_at   | ---      | 3.8  |
| 1398657_at   | ---      | 3.8  |
| 1374503_at   | ---      | 3.8  |
| 1375635_at   | ---      | 3.7  |
| 1373644_at   | ---      | 3.6  |
| 1374635_at   | ---      | 3.6  |
| 1390499_at   | ---      | 3.5  |
| 1369559_a_at | Cd47     | 3.4  |
| 1367705_at   | Glrx1    | 3.4  |
| 1371266_at   | ---      | 3.4  |
| 1374474_at   | ---      | 3.3  |
| 1369755_at   | AF106624 | 3.3  |
| 1374543_at   | ---      | 3.3  |
| 1389613_at   | ---      | 3.3  |
| 1390154_at   | ---      | 3.3  |
| 1389601_at   | ---      | 3.2  |
| 1371969_at   | Cald1    | 3.2  |
| 1368087_a_at | Ptp2E    | 3.0  |
| 1375846_at   | ---      | 3.0  |
| 1375853_at   | ---      | 3.0  |
| 1368751_at   | Kcns3    | 2.9  |
| 1378565_at   | ---      | 2.9  |
| 1371202_a_at | Nfib     | 2.8  |
| 1376765_at   | ---      | 2.8  |
| 1386959_a_at | Map2k5   | 2.7  |
| 1387257_at   | Sct      | 2.7  |
| 1372964_at   | ---      | 2.7  |
| 1374601_at   | ---      | 2.7  |
| 1374418_at   | ---      | 2.6  |
| 1382464_at   | ---      | 2.6  |
| 1373368_at   | ---      | 0.39 |
| 1374143_at   | ---      | 0.38 |
| 1374657_at   | ---      | 0.38 |
| 1374811_at   | ---      | 0.37 |
| 1373676_at   | ---      | 0.37 |
| 1398333_at   | Epas1    | 0.37 |
| 1367657_at   | Btg1     | 0.36 |
| 1390351_at   | ---      | 0.36 |
| 1374176_at   | ---      | 0.36 |
| 1386870_at   | Glns     | 0.36 |
| 1371763_at   | ---      | 0.36 |
| 1373818_at   | ---      | 0.35 |
| 1368064_a_at | Ddc      | 0.35 |
| 1370789_a_at | Prlr     | 0.35 |
| 1372091_at   | ---      | 0.35 |
| 1368503_at   | Gch      | 0.34 |
| 1370928_at   | ---      | 0.34 |
| 1368432_a_at | Ros1     | 0.34 |
| 1369696_at   | Ragb     | 0.34 |
| 1394316_a_at | ---      | 0.34 |

|              |         |      |
|--------------|---------|------|
| 1367633_at   | Glns    | 0.33 |
| 1368209_at   | Map17   | 0.33 |
| 1368614_at   | Wbscr14 | 0.32 |
| 1372455_at   | ---     | 0.32 |
| 1389695_at   | ---     | 0.32 |
| 1371671_at   | ---     | 0.32 |
| 1374376_at   | ---     | 0.32 |
| 1367654_at   | Fat     | 0.31 |
| 1376165_at   | ---     | 0.31 |
| 1369017_at   | Erg2    | 0.30 |
| 1377492_at   | ---     | 0.30 |
| 1368248_at   | Cds1    | 0.29 |
| 1376627_at   | ---     | 0.27 |
| 1387683_at   | Crhr1   | 0.27 |
| 1369698_at   | Abcc3   | 0.27 |
| 1371360_at   | ---     | 0.27 |
| 1369560_at   | Gpd3    | 0.27 |
| 1373755_at   | ---     | 0.27 |
| 1388349_at   | ---     | 0.27 |
| 1372101_at   | Dri42   | 0.25 |
| 1368412_a_at | Ptpro   | 0.24 |
| 1371363_at   | ---     | 0.23 |
| 1369666_at   | Gpd2    | 0.23 |
| 1369773_at   | Bmp3    | 0.23 |
| 1377995_at   | ---     | 0.23 |
| 1389159_at   | ---     | 0.22 |
| 1387670_at   | Gpd2    | 0.22 |
| 1373179_at   | ---     | 0.21 |
| 1387446_at   | C1galt1 | 0.20 |
| 1394135_at   | ---     | 0.20 |
| 1388395_at   | ---     | 0.18 |
| 1369164_a_at | Trpc4   | 0.18 |
| 1369738_s_at | Crem    | 0.17 |
| 1387288_at   | Neurod1 | 0.16 |
| 1389718_at   | ---     | 0.15 |
| 1388000_at   | Slc24a2 | 0.15 |
| 1369737_at   | Crem    | 0.12 |
| 1398464_at   | ---     | 0.08 |
| 1370522_at   | Gcgr    | 0.04 |

**Table SII: HNF6 HNF4 $\alpha$  affected probesets**

| <b>Probeset</b> | <b>Gene</b> | <b>HNF6</b> | <b>HNF4<math>\alpha</math></b> |
|-----------------|-------------|-------------|--------------------------------|
| 1388102_at      | Dig1        | 7.4         | 7.8                            |
| 1375532_at      | Id2         | 7.1         | 3.3                            |
| 1369871_at      | Areg        | 3.3         | 0.02                           |
| 1368358_a_at    | Ptpr        | 3.2         | 3.9                            |
| 1373108_at      | ---         | 2.9         | 5.3                            |
| 1372118_at      | ---         | 0.40        | 0.32                           |
| 1370032_at      | LOC59114    | 0.39        | 3.2                            |
| 1387631_at      | Hpgd        | 0.37        | 4.3                            |
| 1387228_at      | Slc2a2      | 0.33        | 2.6                            |
| 1377145_at      | ---         | 0.32        | 3.0                            |
| 1370725_a_at    | G6pc        | 0.30        | 24.6                           |

|            |        |      |      |
|------------|--------|------|------|
| 1373480_at | ---    | 0.30 | 3.7  |
| 1370823_at | Bambi  | 0.25 | 0.16 |
| 1372841_at | ---    | 0.20 | 5.3  |
| 1387660_at | lapp   | 0.19 | 0.21 |
| 1393894_at | ---    | 0.18 | 0.37 |
| 1387018_at | Argbp2 | 0.16 | 0.34 |
| 1375898_at | ---    | 0.10 | 0.35 |
| 1372380_at | ---    | 0.06 | 0.27 |

**Table SIII: HNF4 $\alpha$  only targets**

| <b>Probeset</b> | <b>Gene</b> | <b>HNF4<math>\alpha</math></b> |
|-----------------|-------------|--------------------------------|
| 1370149_at      | Asgr1       | 397.6                          |
| 1387314_at      | LOC64305    | 114.2                          |
| 1367909_at      | glb         | 44.8                           |
| 1370511_at      | Fgb         | 39.7                           |
| 1367917_at      | Cyp2d2      | 30.0                           |
| 1368052_at      | Tm4sf3      | 25.6                           |
| 1383169_at      | ---         | 22.9                           |
| 1377048_at      | ---         | 22.1                           |
| 1387165_at      | Maf         | 22.0                           |
| 1387239_a_at    | Pdi4        | 21.9                           |
| 1371209_at      | RT1Aw2      | 18.4                           |
| 1387508_at      | Baat        | 17.1                           |
| 1389645_at      | ---         | 15.2                           |
| 1386944_a_at    | G6pc        | 13.2                           |
| 1371171_at      | RT1Aw2      | 12.8                           |
| 1377821_at      | ErbB3       | 12.8                           |
| 1374200_at      | Rasgrf2     | 12.3                           |
| 1367647_at      | Serpina1    | 11.4                           |
| 1368224_at      | Spin2c      | 10.7                           |
| 1388202_at      | RT1Aw2      | 10.6                           |
| 1369313_at      | Fhl2        | 10.6                           |
| 1368046_at      | Slc31a1     | 10.3                           |
| 1382849_at      | ---         | 9.9                            |
| 1368085_at      | Gchfr       | 9.9                            |
| 1376825_at      | ---         | 9.8                            |
| 1368045_at      | Slc31a1     | 9.7                            |
| 1370592_at      | HP33        | 9.1                            |
| 1370299_at      | Aldob       | 8.9                            |
| 1374440_at      | ---         | 8.8                            |
| 1368092_at      | Fah         | 8.5                            |
| 1387209_at      | Rgpr        | 8.5                            |
| 1377079_a_at    | ---         | 8.3                            |
| 1368362_a_at    | Asgr2       | 8.2                            |
| 1372170_at      | Acy1        | 8.2                            |
| 1375073_at      | ---         | 8.1                            |
| 1398370_at      | ---         | 7.6                            |
| 1368238_at      | Pap         | 7.2                            |
| 1374948_at      | ---         | 7.1                            |
| 1388534_at      | ---         | 7.0                            |
| 1392566_at      | ---         | 6.9                            |
| 1388212_a_at    | RT1.S3      | 6.8                            |
| 1387375_at      | Khk         | 6.5                            |
| 1373309_at      | ---         | 6.4                            |

|              |           |     |
|--------------|-----------|-----|
| 1388190_at   | Apob      | 6.4 |
| 1371974_at   | ---       | 6.3 |
| 1369110_x_at | RT1Aw2    | 6.3 |
| 1372752_at   | ---       | 6.2 |
| 1390232_at   | ---       | 6.1 |
| 1369268_at   | Atf3      | 6.1 |
| 1370818_at   | Decr2     | 6.0 |
| 1372844_at   | Efna1     | 5.9 |
| 1374649_at   | ---       | 5.9 |
| 1371123_x_at | RT1.S3    | 5.8 |
| 1373178_at   | ---       | 5.8 |
| 1368593_at   | Cd1d1     | 5.7 |
| 1369088_at   | Erbp3     | 5.7 |
| 1383654_a_at | ---       | 5.7 |
| 1367847_at   | Nupr1     | 5.6 |
| 1371913_at   | Tgfb1     | 5.4 |
| 1372672_at   | ---       | 5.4 |
| 1398273_at   | Efna1     | 5.4 |
| 1370220_at   | Risc      | 5.4 |
| 1387870_at   | Zfp36     | 5.4 |
| 1388210_at   | Mte1      | 5.3 |
| 1388213_a_at | RT1.S3    | 5.2 |
| 1380600_at   | ---       | 5.2 |
| 1371951_at   | Fhl2      | 5.2 |
| 1387038_at   | Ccs       | 5.1 |
| 1369943_at   | Tgm2      | 5.1 |
| 1370009_at   | Apoc3     | 5.1 |
| 1368790_at   | Serpina10 | 5.1 |
| 1372774_at   | ---       | 5.1 |
| 1387214_at   | Ces1      | 5.0 |
| 1367994_at   | Dpyd      | 5.0 |
| 1372665_at   | Psat1     | 5.0 |
| 1376808_at   | ---       | 4.9 |
| 1375954_at   | ---       | 4.8 |
| 1388555_at   | ---       | 4.8 |
| 1367995_at   | Cat       | 4.8 |
| 1388203_x_at | RT1Aw2    | 4.8 |
| 1367673_at   | Selenbp2  | 4.7 |
| 1376009_at   | ---       | 4.7 |
| 1386976_at   | Kai1      | 4.7 |
| 1386880_at   | Acaa2     | 4.7 |
| 1377151_at   | ---       | 4.6 |
| 1377155_at   | ---       | 4.6 |
| 1374221_at   | Slc29a3   | 4.6 |
| 1368077_at   | Fbp1      | 4.6 |
| 1372297_at   | ---       | 4.4 |
| 1372302_at   | ---       | 4.4 |
| 1367843_at   | Akr7a2    | 4.4 |
| 1374767_at   | ---       | 4.4 |
| 1387867_at   | Aldh9a1   | 4.3 |
| 1390237_at   | Timm8a    | 4.2 |
| 1389230_at   | ---       | 4.2 |
| 1389219_at   | ---       | 4.2 |
| 1388077_a_at | P2rx3     | 4.1 |
| 1389017_at   | ---       | 4.1 |
| 1368180_s_at | Gsta2     | 4.1 |

|              |          |     |
|--------------|----------|-----|
| 1371030_at   | LOC94168 | 4.0 |
| 1373337_at   | ---      | 4.0 |
| 1376226_at   | ---      | 4.0 |
| 1376191_at   | Hpgd     | 4.0 |
| 1368622_at   | Fbp2     | 4.0 |
| 1387253_at   | Guca2b   | 4.0 |
| 1375924_at   | ---      | 3.9 |
| 1373743_at   | ---      | 3.9 |
| 1368774_a_at | Espn     | 3.9 |
| 1387445_at   | Phkg1    | 3.9 |
| 1398249_at   | Slc25a20 | 3.9 |
| 1373732_at   | ---      | 3.9 |
| 1372997_at   | ---      | 3.8 |
| 1370824_at   | Slc38a3  | 3.8 |
| 1371919_at   | ---      | 3.8 |
| 1384347_at   | ---      | 3.8 |
| 1388164_at   | RT1.S3   | 3.8 |
| 1371519_at   | Etfdh    | 3.8 |
| 1367675_at   | Sip2-28  | 3.7 |
| 1374478_at   | ---      | 3.7 |
| 1376595_at   | ---      | 3.7 |
| 1389744_at   | ---      | 3.7 |
| 1371748_at   | ---      | 3.7 |
| 1371774_at   | Sat      | 3.7 |
| 1387669_a_at | Ephx1    | 3.7 |
| 1388647_at   | ---      | 3.7 |
| 1367741_at   | Herpud1  | 3.6 |
| 1371697_at   | ---      | 3.6 |
| 1374254_a_at | ---      | 3.6 |
| 1388358_at   | ---      | 3.6 |
| 1389358_at   | ---      | 3.6 |
| 1374518_at   | ---      | 3.6 |
| 1386904_a_at | Cyb5     | 3.6 |
| 1369633_at   | Cxcl12   | 3.6 |
| 1371615_at   | Dgat2    | 3.6 |
| 1372681_at   | ---      | 3.6 |
| 1388720_at   | ---      | 3.6 |
| 1374648_at   | ---      | 3.5 |
| 1372600_at   | ---      | 3.5 |
| 1387202_at   | Icam1    | 3.5 |
| 1367908_at   | Gcsh     | 3.5 |
| 1390208_at   | ---      | 3.5 |
| 1390454_at   | ---      | 3.5 |
| 1372177_at   | ---      | 3.5 |
| 1389725_at   | ---      | 3.5 |
| 1390378_at   | ---      | 3.5 |
| 1373963_at   | ---      | 3.4 |
| 1371875_at   | ---      | 3.4 |
| 1372895_at   | ---      | 3.4 |
| 1374222_at   | ---      | 3.4 |
| 1368826_at   | Comt     | 3.4 |
| 1390383_at   | ADRP     | 3.4 |
| 1367791_at   | Ramp1    | 3.3 |
| 1373512_at   | ---      | 3.3 |
| 1388558_at   | ---      | 3.3 |
| 1368071_at   | Mg87     | 3.3 |

|              |          |     |
|--------------|----------|-----|
| 1384391_at   | Rdh10    | 3.3 |
| 1369898_a_at | Gludins  | 3.3 |
| 1368400_at   | Timm8a   | 3.3 |
| 1374568_at   | ---      | 3.3 |
| 1376068_at   | ---      | 3.3 |
| 1374512_at   | ---      | 3.2 |
| 1367828_at   | Acads    | 3.2 |
| 1370020_at   | Slc25a10 | 3.2 |
| 1389412_at   | ---      | 3.2 |
| 1370699_a_at | Egfr     | 3.2 |
| 1390366_at   | ---      | 3.2 |
| 1367765_at   | Tcn2p    | 3.2 |
| 1372276_at   | ---      | 3.2 |
| 1367905_at   | LOC54410 | 3.2 |
| 1389129_at   | ---      | 3.1 |
| 1388587_at   | ---      | 3.1 |
| 1390131_at   | ---      | 3.1 |
| 1373918_at   | ---      | 3.1 |
| 1367745_at   | Dgkz     | 3.1 |
| 1369390_a_at | Dpp6     | 3.0 |
| 1374620_at   | Ceacam1  | 3.0 |
| 1371131_a_at | Vdup1    | 3.0 |
| 1388501_at   | ---      | 3.0 |
| 1367796_at   | Mgat1    | 3.0 |
| 1389794_at   | ---      | 3.0 |
| 1388937_at   | ---      | 3.0 |
| 1372458_at   | ---      | 2.9 |
| 1376151_a_at | ---      | 2.9 |
| 1368426_at   | Crot     | 2.9 |
| 1387027_a_at | Lgals9   | 2.9 |
| 1388537_at   | ---      | 2.9 |
| 1369716_s_at | Lgals5   | 2.9 |
| 1373162_at   | ---      | 2.9 |
| 1371525_at   | ---      | 2.9 |
| 1374808_at   | ---      | 2.9 |
| 1389229_at   | ---      | 2.9 |
| 1377474_at   | ---      | 2.8 |
| 1367793_at   | Ddt      | 2.8 |
| 1368122_at   | Zfp103   | 2.8 |
| 1373158_at   | ---      | 2.8 |
| 1372313_at   | ---      | 2.8 |
| 1387859_at   | Myh6     | 2.8 |
| 1389468_at   | ---      | 2.8 |
| 1390149_at   | ---      | 2.8 |
| 1372475_at   | ---      | 2.8 |
| 1368095_at   | Ak3      | 2.7 |
| 1388913_at   | Ppap2c   | 2.7 |
| 1388786_at   | ---      | 2.7 |
| 1371580_at   | ---      | 2.7 |
| 1367735_at   | Acadl    | 2.7 |
| 1373866_at   | ---      | 2.7 |
| 1390513_at   | ---      | 2.7 |
| 1386926_at   | Facl5    | 2.6 |
| 1373240_at   | ---      | 2.6 |
| 1388071_x_at | RT1Aw2   | 2.6 |
| 1371560_at   | ---      | 2.6 |

|              |         |      |
|--------------|---------|------|
| 1388337_at   | Np      | 2.6  |
| 1389549_at   | ---     | 2.6  |
| 1375910_at   | ---     | 0.39 |
| 1389597_at   | ---     | 0.38 |
| 1367701_at   | Ramp2   | 0.37 |
| 1386895_at   | Maged1  | 0.36 |
| 1368477_at   | Atp2a3  | 0.35 |
| 1375183_at   | Idb4    | 0.35 |
| 1386857_at   | Stmn1   | 0.35 |
| 1388963_at   | ---     | 0.35 |
| 1372234_at   | ---     | 0.35 |
| 1371487_at   | ---     | 0.34 |
| 1377125_at   | ---     | 0.34 |
| 1374976_a_at | Soat1   | 0.33 |
| 1373747_at   | ---     | 0.33 |
| 1375433_at   | ---     | 0.33 |
| 1373902_at   | ---     | 0.32 |
| 1370042_at   | Stmn2   | 0.32 |
| 1393251_at   | ---     | 0.32 |
| 1369004_at   | Rab26   | 0.32 |
| 1375843_at   | ---     | 0.32 |
| 1390403_at   | ---     | 0.32 |
| 1387241_at   | Gpr88   | 0.31 |
| 1370341_at   | Eno2    | 0.31 |
| 1370815_at   | Nefh    | 0.31 |
| 1389208_at   | ---     | 0.31 |
| 1368350_at   | Ptprz1  | 0.30 |
| 1398373_at   | ---     | 0.30 |
| 1367857_at   | Fads1   | 0.30 |
| 1370290_at   | Tubb5   | 0.30 |
| 1386862_at   | Anxa5   | 0.30 |
| 1367668_a_at | Scd2    | 0.30 |
| 1368686_at   | Ambp    | 0.30 |
| 1387024_at   | Dusp6   | 0.29 |
| 1386648_at   | ---     | 0.29 |
| 1371798_at   | Gna12   | 0.29 |
| 1390082_at   | Hip1    | 0.29 |
| 1369976_at   | Pin     | 0.28 |
| 1386968_at   | Ppp1r1a | 0.28 |
| 1388464_at   | ---     | 0.28 |
| 1373865_at   | Snap91  | 0.27 |
| 1392996_at   | ---     | 0.27 |
| 1369074_at   | Ata3    | 0.27 |
| 1389132_at   | Hip1    | 0.26 |
| 1370041_at   | Stmn2   | 0.25 |
| 1375861_at   | ---     | 0.25 |
| 1373363_at   | Map1b   | 0.25 |
| 1387141_at   | Crmp5   | 0.24 |
| 1386889_at   | Scd2    | 0.24 |
| 1387032_at   | Cck     | 0.23 |
| 1368404_at   | Dbn1    | 0.23 |
| 1373886_at   | ---     | 0.23 |
| 1382778_at   | Dusp6   | 0.22 |
| 1368044_at   | Scg2    | 0.21 |
| 1372637_at   | ---     | 0.21 |
| 1374613_at   | ---     | 0.21 |



|              |        |      |
|--------------|--------|------|
| 1370625_at   | Lfg    | 0.18 |
| 1368359_a_at | Vgf    | 0.18 |
| 1387155_at   | Pcsk2  | 0.17 |
| 1369968_at   | Ptn    | 0.17 |
| 1388152_at   | Mtap2  | 0.17 |
| 1373202_at   | ---    | 0.16 |
| 1376801_at   | ---    | 0.15 |
| 1390640_at   | ---    | 0.14 |
| 1392941_at   | ---    | 0.14 |
| 1368438_at   | Pde10a | 0.12 |
| 1388193_at   | Hip1   | 0.05 |

**Table SIV: HNF4 $\alpha$  HNF1 $\beta$  affected probesets**

| Probeset   | Gene    | HNF4 $\alpha$ | HNF1 $\beta$ |
|------------|---------|---------------|--------------|
| 1385243_at | ---     | 22.9          | 4.6          |
| 1387022_at | Aldh1a1 | 19.3          | 4.4          |
| 1390042_at | ---     | 11.2          | 11.2         |
| 1368762_at | Ubd     | 9.9           | 65.3         |
| 1372328_at | ---     | 4.5           | 3.6          |
| 1386979_at | Tpo1    | 4.1           | 5.3          |
| 1368514_at | Maob    | 3.9           | 0.29         |
| 1370365_at | Gss     | 3.7           | 2.8          |
| 1367598_at | Ttr     | 3.6           | 3.0          |
| 1373093_at | ---     | 3.1           | 0.33         |
| 1372132_at | ---     | 2.9           | 3.3          |
| 1376804_at | ---     | 2.9           | 6.3          |
| 1374778_at | Ctsc    | 2.8           | 10.0         |
| 1372655_at | ---     | 2.6           | 3.5          |
| 1387013_at | NX-17   | 0.35          | 4.2          |
| 1387147_at | Rab3c   | 0.33          | 2.9          |
| 1386881_at | Igfbp3  | 0.32          | 0.12         |
| 1369691_at | Scn3a   | 0.31          | 0.05         |
| 1388666_at | ---     | 0.27          | 0.27         |
| 1368145_at | Pcp4    | 0.27          | 0.36         |
| 1368465_at | Accn1   | 0.24          | 0.31         |
| 1378421_at | ---     | 0.18          | 0.34         |
| 1384202_at | ---     | 0.18          | 0.35         |
| 1373710_at | ---     | 0.16          | 0.35         |
| 1368028_at | Prph1   | 0.07          | 0.32         |

**Table SV: HNF1 $\beta$  only targets**

| Probeset     | Gene      | HNF1 $\beta$ |
|--------------|-----------|--------------|
| 1370468_at   | Slc13a1   | 161.5        |
| 1370465_at   | Abcb1a    | 105.4        |
| 1387139_at   | Hao3      | 88.0         |
| 1368745_at   | Slc10a2   | 74.3         |
| 1370349_a_at | Atpi      | 56.7         |
| 1388269_at   | Hbb-y     | 39.4         |
| 1370464_at   | Abcb1a    | 39.1         |
| 1374280_at   | ---       | 36.8         |
| 1370852_at   | LOC171573 | 34.5         |
| 1370467_at   | Slc13a1   | 34.0         |

|              |        |      |
|--------------|--------|------|
| 1367733_at   | Ca2    | 33.5 |
| 1390591_at   | Rnpt4  | 28.8 |
| 1386922_at   | Ca2    | 25.4 |
| 1370269_at   | Cyp1a1 | 23.2 |
| 1387889_at   | Folr1  | 22.4 |
| 1377223_at   | ---    | 20.6 |
| 1370072_at   | Mme    | 20.5 |
| 1370396_x_at | Atpi   | 17.9 |
| 1387174_a_at | Star   | 16.7 |
| 1368280_at   | Ctsc   | 16.6 |
| 1389270_x_at | ---    | 16.4 |
| 1387799_at   | Fxyd2  | 15.8 |
| 1376632_at   | ---    | 15.5 |
| 1370256_at   | ---    | 14.4 |
| 1367977_at   | Snca   | 14.0 |
| 1367774_at   | Gsta1  | 12.7 |
| 1368178_at   | Pdzk1  | 11.3 |
| 1368440_at   | Slc3a1 | 10.0 |
| 1369695_at   | Wt1    | 9.6  |
| 1381489_at   | ---    | 9.5  |
| 1375646_at   | ---    | 9.4  |
| 1387037_at   | Cubn   | 8.5  |
| 1388183_at   | ---    | 7.7  |
| 1371237_a_at | Mt1a   | 7.5  |
| 1376601_at   | ---    | 7.4  |
| 1387571_at   | Nr2f1  | 7.3  |
| 1368114_at   | Fgf13  | 7.2  |
| 1367804_at   | Sap    | 7.1  |
| 1371988_at   | ---    | 7.0  |
| 1387825_at   | Ugt2b  | 6.6  |
| 1376319_at   | ---    | 6.5  |
| 1369073_at   | Nr1h4  | 6.5  |
| 1392841_at   | ---    | 6.3  |
| 1383906_at   | ---    | 6.3  |
| 1369318_at   | Fhit   | 6.3  |
| 1370895_at   | Col5a2 | 6.1  |
| 1390807_at   | ---    | 6.1  |
| 1398612_at   | ---    | 6.1  |
| 1373463_at   | Col5a2 | 6.0  |
| 1388936_at   | Cdh11  | 5.7  |
| 1370583_s_at | Pgy1   | 5.6  |
| 1371953_at   | ---    | 5.5  |
| 1374546_at   | ---    | 5.4  |
| 1389528_s_at | Jun    | 5.4  |
| 1368406_at   | Star   | 5.1  |
| 1368363_at   | Klf5   | 4.8  |
| 1376770_at   | ---    | 4.7  |
| 1374812_at   | ---    | 4.7  |
| 1369788_s_at | Jun    | 4.6  |
| 1389801_at   | Fgfr4  | 4.6  |
| 1370367_at   | Slc1a1 | 4.6  |
| 1370688_at   | Gclc   | 4.6  |
| 1372523_at   | Gclc   | 4.5  |
| 1374628_at   | ---    | 4.5  |
| 1387327_at   | Slm1   | 4.4  |
| 1376279_at   | ---    | 4.4  |

|            |           |     |
|------------|-----------|-----|
| 1391573_at | ---       | 4.4 |
| 1387932_at | Slc1a1    | 4.4 |
| 1375080_at | ---       | 4.3 |
| 1377168_at | ---       | 4.3 |
| 1368736_at | Tsx       | 4.3 |
| 1372332_at | ---       | 4.2 |
| 1370436_at | LOC246263 | 4.2 |
| 1375944_at | ---       | 4.2 |
| 1387830_at | Crp       | 4.2 |
| 1374432_at | Alcam     | 4.1 |
| 1370146_at | Glrb      | 4.1 |
| 1373410_at | ---       | 4.1 |
| 1374640_at | ---       | 4.1 |
| 1367952_at | Lrp2      | 4.0 |
| 1370381_at | Prol2     | 3.9 |
| 1374393_at | ---       | 3.9 |
| 1368947_at | Gadd45a   | 3.9 |
| 1383767_at | ---       | 3.9 |
| 1368963_at | Mxi1      | 3.9 |
| 1373900_at | ---       | 3.8 |
| 1387449_at | Tshr      | 3.8 |
| 1370043_at | Alcam     | 3.8 |
| 1387821_at | RABIN3    | 3.8 |
| 1389679_at | ---       | 3.8 |
| 1387984_at | Cklf1     | 3.6 |
| 1373374_at | ---       | 3.6 |
| 1377573_at | ---       | 3.6 |
| 1372187_at | ---       | 3.6 |
| 1370572_at | Ieda      | 3.5 |
| 1374624_at | Galnt11   | 3.5 |
| 1376958_at | ---       | 3.5 |
| 1370875_at | Vil2      | 3.5 |
| 1373164_at | Stk17b    | 3.5 |
| 1376194_at | ---       | 3.4 |
| 1370282_at | Csrp2     | 3.4 |
| 1369043_at | Kcna4     | 3.4 |
| 1373975_at | ---       | 3.3 |
| 1373421_at | ---       | 3.3 |
| 1375896_at | ---       | 3.3 |
| 1387878_at | Glud1     | 3.3 |
| 1376852_at | ---       | 3.2 |
| 1370200_at | Glud1     | 3.2 |
| 1372676_at | ---       | 3.2 |
| 1374137_at | Elf1      | 3.2 |
| 1387502_at | Stk17b    | 3.2 |
| 1372093_at | ---       | 3.2 |
| 1372311_at | ---       | 3.2 |
| 1375724_at | ---       | 3.2 |
| 1387301_at | Fgf1      | 3.2 |
| 1368463_at | Vegfc     | 3.1 |
| 1369956_at | lfngr     | 3.1 |
| 1375894_at | ---       | 3.1 |
| 1390569_at | ---       | 3.1 |
| 1370111_at | Kcnn2     | 3.1 |
| 1389386_at | ---       | 3.1 |
| 1377289_at | ---       | 3.0 |

|              |          |      |
|--------------|----------|------|
| 1389146_at   | ---      | 3.0  |
| 1387245_at   | RNLIP    | 3.0  |
| 1372095_at   | ---      | 3.0  |
| 1369129_at   | Rasgrp1  | 2.9  |
| 1398401_at   | ---      | 2.9  |
| 1367795_at   | lfrd1    | 2.9  |
| 1387637_a_at | Fgf14    | 2.9  |
| 1368702_at   | Pawr     | 2.9  |
| 1372542_at   | ---      | 2.8  |
| 1390164_at   | ---      | 2.8  |
| 1389592_at   | ---      | 2.8  |
| 1372474_at   | ---      | 2.8  |
| 1374404_at   | Jun      | 2.8  |
| 1387495_at   | Tle4     | 2.8  |
| 1388092_at   | Olfr41   | 2.8  |
| 1375879_at   | Gpr48    | 2.7  |
| 1393467_at   | Pcsk5    | 2.7  |
| 1390647_at   | ---      | 2.7  |
| 1374410_at   | ---      | 2.7  |
| 1376265_at   | ---      | 2.6  |
| 1389091_at   | ---      | 2.6  |
| 1372515_at   | ---      | 2.6  |
| 1388167_at   | Nfib     | 2.6  |
| 1376357_at   | ---      | 2.6  |
| 1371447_at   | ---      | 2.5  |
| 1389199_at   | ---      | 2.5  |
| 1370585_a_at | Prkcb1   | 0.39 |
| 1389193_at   | ---      | 0.39 |
| 1371036_at   | Nrcam    | 0.38 |
| 1372117_at   | ---      | 0.37 |
| 1371113_a_at | Tfrc     | 0.36 |
| 1370571_at   | Slc21a11 | 0.36 |
| 1373500_at   | ---      | 0.36 |
| 1373855_at   | ---      | 0.36 |
| 1376089_at   | Ldlr     | 0.35 |
| 1367888_at   | KIAA1775 | 0.35 |
| 1376183_at   | Dpp6     | 0.35 |
| 1373659_at   | ---      | 0.35 |
| 1388973_at   | ---      | 0.35 |
| 1369249_at   | Ank      | 0.34 |
| 1387169_at   | Tle3     | 0.34 |
| 1377069_at   | ---      | 0.33 |
| 1374616_at   | ---      | 0.33 |
| 1373734_at   | Slc21a11 | 0.33 |
| 1377534_at   | ---      | 0.33 |
| 1369509_a_at | A1bg     | 0.33 |
| 1387812_at   | Pace4    | 0.32 |
| 1370248_at   | Fxyd6    | 0.32 |
| 1373624_at   | ---      | 0.32 |
| 1384008_at   | ---      | 0.32 |
| 1368536_at   | Enpp2    | 0.32 |
| 1368706_at   | Tm4sf4   | 0.31 |
| 1389707_at   | ---      | 0.31 |
| 1368123_at   | Igf1r    | 0.31 |
| 1368182_at   | Facl6    | 0.31 |
| 1368481_at   | Gipr     | 0.31 |

|              |           |      |
|--------------|-----------|------|
| 1373159_at   | ---       | 0.30 |
| 1370047_at   | Enpp1     | 0.30 |
| 1368266_at   | Arg1      | 0.29 |
| 1372606_at   | ---       | 0.29 |
| 1376285_at   | ---       | 0.29 |
| 1374762_at   | ---       | 0.28 |
| 1368998_at   | Nkx6a     | 0.27 |
| 1388743_at   | ---       | 0.26 |
| 1369782_a_at | Kcnj11    | 0.26 |
| 1382944_at   | ---       | 0.24 |
| 1373478_at   | Mybph     | 0.23 |
| 1391062_at   | ---       | 0.23 |
| 1371091_at   | LOC207125 | 0.23 |
| 1390385_at   | ---       | 0.22 |
| 1369035_a_at | Kcnj6     | 0.21 |
| 1389206_at   | ---       | 0.20 |
| 1377412_at   | ---       | 0.17 |
| 1370750_a_at | Il1r1     | 0.17 |
| 1368914_at   | Runx1     | 0.16 |
| 1368313_a_at | Trpv1     | 0.15 |
| 1374257_at   | ---       | 0.15 |
| 1369386_at   | Slc26a2   | 0.14 |
| 1367652_at   | Igfbp3    | 0.14 |
| 1387947_at   | Mafb      | 0.13 |
| 1374974_at   | ---       | 0.12 |
| 1369638_at   | Eef2k     | 0.07 |

**Table SVI: HNF1 $\beta$  HNF6 affected probesets**

| <b>Probeset</b> | <b>Gene</b> | <b>HNF1<math>\beta</math></b> | <b>HNF6</b> |
|-----------------|-------------|-------------------------------|-------------|
| 1370615_at      | LOC286989   | 27.3                          | 46.4        |
| 1387955_at      | Udpgt       | 12.2                          | 12.9        |
| 1368339_at      | Calb3       | 6.9                           | 20.6        |
| 1368677_at      | Bdnf        | 6.6                           | 2.5         |
| 1388778_at      | ---         | 4.4                           | 2.9         |
| 1389074_at      | ---         | 4.4                           | 3.6         |
| 1390530_at      | ---         | 3.7                           | 4.4         |
| 1370264_at      | Syne1       | 3.2                           | 3.1         |
| 1372440_at      | Serpine2    | 3.2                           | 3.1         |
| 1370342_at      | Kcnk2       | 3.0                           | 0.26        |
| 1372248_at      | ---         | 2.7                           | 4.5         |
| 1367698_a_at    | Slpa        | 0.37                          | 0.27        |
| 1373803_a_at    | Ghr         | 0.35                          | 0.32        |
| 1372055_at      | ---         | 0.35                          | 0.21        |
| 1386906_a_at    | Slpa        | 0.35                          | 0.27        |
| 1368983_at      | Dtr         | 0.33                          | 0.29        |
| 1369242_at      | Pax6        | 0.33                          | 0.38        |
| 1373336_at      | ---         | 0.32                          | 0.24        |
| 1369777_a_at    | Shank2      | 0.32                          | 0.33        |
| 1369632_a_at    | Abcc8       | 0.31                          | 0.28        |
| 1375199_at      | ---         | 0.31                          | 0.37        |
| 1376633_at      | ---         | 0.30                          | 0.27        |
| 1373777_at      | ---         | 0.29                          | 0.17        |
| 1369822_at      | Kit         | 0.29                          | 0.30        |

|              |         |      |      |
|--------------|---------|------|------|
| 1372989_at   | ---     | 0.29 | 0.22 |
| 1387395_at   | Adora2b | 0.28 | 0.14 |
| 1386987_at   | Il6r    | 0.28 | 0.18 |
| 1373513_at   | Gch     | 0.27 | 0.16 |
| 1398431_at   | ---     | 0.27 | 3.1  |
| 1387221_at   | Gch     | 0.25 | 0.14 |
| 1388792_at   | ---     | 0.25 | 0.28 |
| 1369457_a_at | Sytl4   | 0.22 | 0.13 |
| 1387906_a_at | Gnas    | 0.22 | 0.22 |
| 1369752_a_at | Camk4   | 0.21 | 0.26 |
| 1376891_at   | ---     | 0.21 | 0.30 |
| 1374168_at   | ---     | 0.20 | 0.07 |
| 1387623_at   | Stc1    | 0.19 | 0.06 |
| 1371679_at   | ---     | 0.18 | 0.23 |
| 1368979_at   | Hapip   | 0.17 | 0.07 |
| 1369516_at   | Pdx1    | 0.17 | 0.19 |
| 1369888_at   | Gcg     | 0.17 | 0.08 |
| 1368924_at   | Ghr     | 0.14 | 0.12 |
| 1376398_at   | ---     | 0.11 | 0.19 |
| 1370430_at   | Dat1    | 0.10 | 0.34 |
| 1387698_at   | Kcnj11  | 0.10 | 0.14 |
| 1368641_at   | Wnt4    | 0.06 | 0.07 |
| 1375052_at   | ---     | 0.01 | 0.01 |
